# Supplementary material for: Photocatalytic and Cathode Active Abilities of Ni-Substituted α-FeOOH Nanoparticles
Source: MDPI journal article supplement (doi:10.3390/ijms241814300), 2023-09-19
Supplement: s1 [file s1]

# **Photocatalytic and cathode active abilities of Ni-substituted $\alpha$ -FeOOH nanoparticles**

A. Ibrahim<sup>1</sup>, M. Shiraishi<sup>1</sup>, Z. Homonnay<sup>2</sup>, E. Kuzmann<sup>2</sup>, S. Krehula<sup>3</sup>, M. Marciuš<sup>3</sup>,

A. Bafti<sup>3</sup>, L. Pavić<sup>3</sup>, S. Kubuki<sup>1,\*</sup>

*<sup>1</sup>Department of Chemistry, Graduate School of Science, Tokyo Metropolitan University,*

*Tokyo, Japan*

*<sup>2</sup>Institute of Chemistry, Eötvös Loránd University, Budapest, Hungary*

*<sup>3</sup>Division of Materials Chemistry, Ruđer Bošković Institute, Zagreb, Croatia*

\*Corresponding author: [kubuki@tmu.ac.jp](mailto:kubuki@tmu.ac.jp)

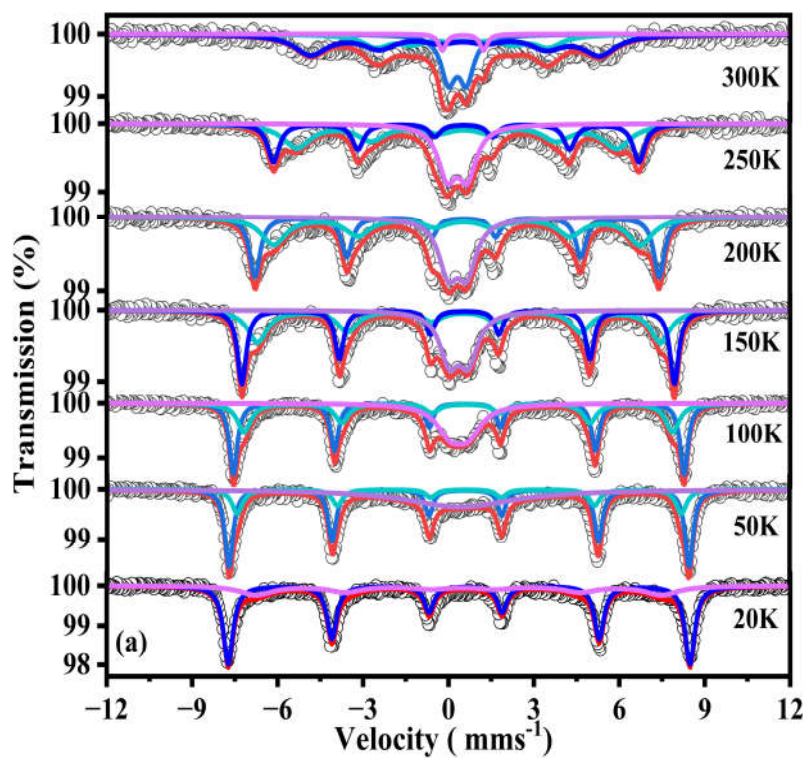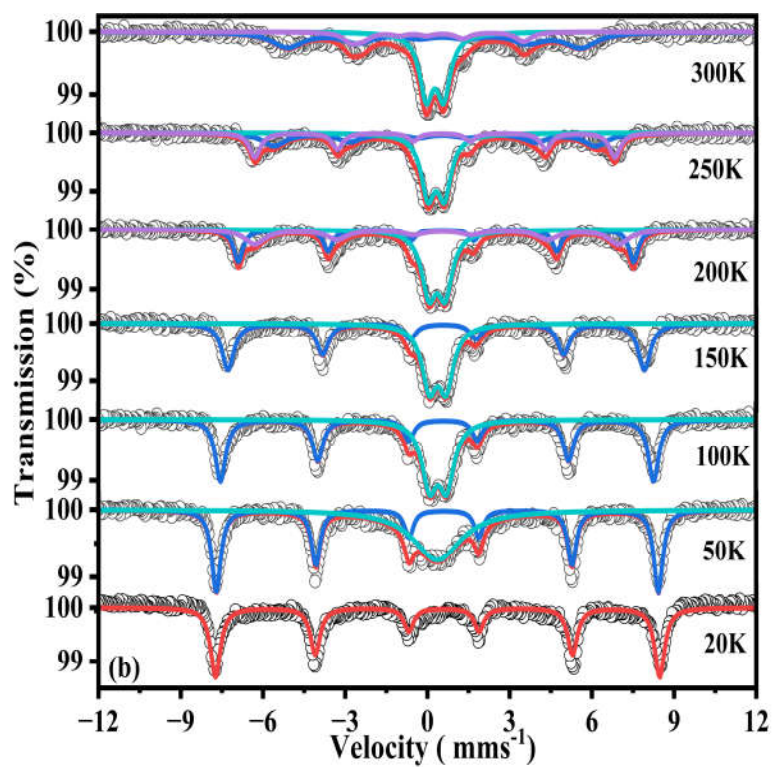

**Figure S1.**  $^{57}\text{Fe}$ - Mössbauer spectra measured at low temperatures from 20K to 300K (a) Ni10 and (b) Ni20.

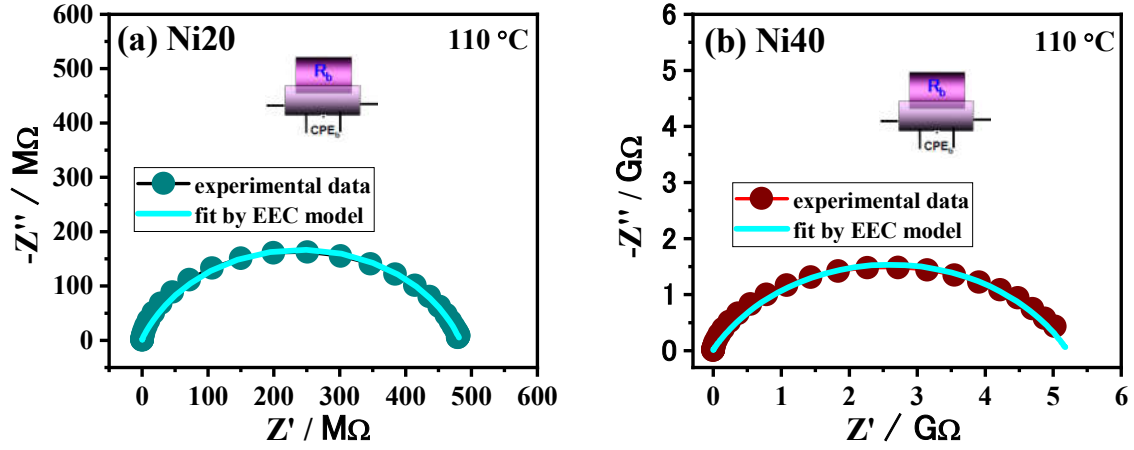

**Figure S2.** Complex impedance spectra @110 °C for sample (a) Ni20, and (b) Ni40. The symbols (colored circle) denote experimental values, whereas the solid cyan line corresponds to the best fit. The corresponding equivalent circuit model, comprised of parallel combination of the resistor (R) and the constant-phase element (CPE), used for fitting the data of an individual spectrum, and its interpretation is shown in each figure (defined as follows: b-bulk phase).

**Table S1.** Mössbauer parameters of  $\alpha$ -Ni<sub>x</sub>Fe<sub>1-x</sub>OOH nanoparticles obtained from the <sup>57</sup>Fe-Mössbauer spectra measured in the range of velocity from 10 mm s<sup>-1</sup> to -10 mm s<sup>-1</sup> at 86K.

| Sample | Component | A (%) | $\delta$ (mms <sup>-1</sup> ) | $\Delta$ (mms <sup>-1</sup> ) | $\Gamma$ (mms <sup>-1</sup> ) | $H_{\text{int}}$ (T) | Phase    |
|--------|-----------|-------|-------------------------------|-------------------------------|-------------------------------|----------------------|----------|
| Ni0    | sextet    | 80.50 | 0.47 <sub>±0.01</sub>         | -0.25 <sub>±0.01</sub>        | (1 6)0.43 <sub>±0.01</sub>    | 32.9                 | Goethite |
|        |           |       |                               |                               | (2 5)0.39 <sub>±0.01</sub>    |                      |          |
|        |           |       |                               |                               | (3 4)0.34 <sub>±0.04</sub>    |                      |          |
|        | sextet    | 19.50 | 0.46 <sub>±0.01</sub>         | -0.22 <sub>±0.01</sub>        | (1 6)0.28 <sub>±0.04</sub>    | 50.1                 | Goethite |
|        |           |       |                               |                               | (2 5)0.19 <sub>±0.04</sub>    |                      |          |
|        |           |       |                               |                               | (3 4)0.35 <sub>±0.16</sub>    |                      |          |
| Ni5    | sextet    | 71.39 | 0.46 <sub>±0.01</sub>         | -0.22 <sub>±0.01</sub>        | (1 6)0.39 <sub>±0.01</sub>    | 49.6                 | Goethite |
|        |           |       |                               |                               | (2 5)0.33 <sub>±0.01</sub>    |                      |          |
|        |           |       |                               |                               | (3 4)0.35 <sub>±0.02</sub>    |                      |          |
|        | sextet    | 20.42 | 0.49 <sub>±0.01</sub>         | -0.27 <sub>±0.02</sub>        | (1 6)0.50 <sub>±0.06</sub>    | 47.8                 | Goethite |
|        |           |       |                               |                               | (2 5)0.47 <sub>±0.05</sub>    |                      |          |
|        |           |       |                               |                               | (3 4)0.38 <sub>±0.08</sub>    |                      |          |
| Ni10   | sextet    | 74.91 | 0.47 <sub>±0.01</sub>         | -0.24 <sub>±0.00</sub>        | 1.94 <sub>±0.64</sub>         | -                    | Unknown  |
|        |           |       |                               |                               | (1 6)0.43 <sub>±0.01</sub>    |                      |          |
|        |           |       |                               |                               | (2 5)0.37 <sub>±0.01</sub>    |                      |          |

|      |         |       |                    |                     |                         |      |           |
|------|---------|-------|--------------------|---------------------|-------------------------|------|-----------|
|      |         |       |                    |                     | (3 4)0.33 $_{\pm 0.01}$ |      |           |
|      | doublet | 12.63 | 0.46 $_{\pm 0.01}$ | 0.66 $_{\pm 0.03}$  | 0.53 $_{\pm 0.09}$      | -    | Amorphous |
|      | doublet | 12.46 | 0.35 $_{\pm 0.09}$ | 0.00 $_{\pm 56.12}$ | 1.81 $_{\pm 0.64}$      | -    | Unknown   |
| Ni20 | sextet  | 15.04 | 0.43 $_{\pm 0.01}$ | -0.10 $_{\pm 0.03}$ | (1 6)1.00 $_{\pm 0.06}$ | 49.4 | Goethite  |
|      |         |       |                    |                     | (2 5)0.82 $_{\pm 0.05}$ |      |           |
|      |         |       |                    |                     | (3 4)0.61 $_{\pm 0.06}$ |      |           |
|      | doublet | 84.96 | 0.44 $_{\pm 0.01}$ | 0.71 $_{\pm 0.01}$  | 0.74 $_{\pm 0.01}$      | -    | Amorphous |

$\delta$ : isomer shift,  $\Delta$ : quadrupole splitting,  $\Gamma$ : FWHM,  $H_{\text{int}}$ : Internal magnetic field.

**Table S2.** Mössbauer parameters of  $\alpha$ -Ni<sub>x</sub>Fe<sub>1-x</sub>OOH nanoparticles obtained from the <sup>57</sup>Fe-Mössbauer spectra measured in the range of velocity from 3 mm s<sup>-1</sup> to -3 mm s<sup>-1</sup> at 86 K

| Sample | Component | $A$<br>(%) | $\delta$<br>(mms <sup>-1</sup> ) | $\Delta$<br>(mms <sup>-1</sup> ) | $\Gamma$<br>(mms <sup>-1</sup> ) | $H_{\text{int}}$<br>(T) | Phase        |
|--------|-----------|------------|----------------------------------|----------------------------------|----------------------------------|-------------------------|--------------|
| Ni20   | sextet    | 12.37      | 0.43 $_{\pm 0.01}$               | -0.10 $_{\pm 0.01}$              | 0.58 $_{\pm 0.12}$               | 49.4                    | Goethite     |
|        | doublet   | 87.63      | 0.44 $_{\pm 0.01}$               | 0.70 $_{\pm 0.01}$               | 0.75 $_{\pm 0.01}$               | -                       | Amorphous    |
| Ni50   | doublet   | 36.80      | 0.45 $_{\pm 0.01}$               | 0.89 $_{\pm 0.01}$               | 0.45 $_{\pm 0.01}$               | -                       | Ferrihydrite |
|        | doublet   | 63.20      | 0.44 $_{\pm 0.01}$               | 0.47 $_{\pm 0.01}$               | 0.39 $_{\pm 0.01}$               | -                       | Unknown      |

$\delta$ : isomer shift,  $\Delta$ : quadrupole splitting,  $\Gamma$ : FWHM,  $H_{\text{int}}$ : Internal magnetic field

**Table S3:**  $^{57}\text{Fe}$ - Mössbauer spectra measured at low temperature from 20K to 300K of Ni10

| <b>T/K</b> | <b>Component</b> | <b><math>A</math><br/>(%)</b> | <b><math>\delta</math><br/>(mms<math>^{-1}</math>)</b> | <b><math>\Delta</math><br/>(mms<math>^{-1}</math>)</b> | <b><math>\Gamma</math><br/>(mms<math>^{-1}</math>)</b> | <b><math>H_{\text{int}}</math><br/>(T)</b> | <b>Phase</b> |
|------------|------------------|-------------------------------|--------------------------------------------------------|--------------------------------------------------------|--------------------------------------------------------|--------------------------------------------|--------------|
| <b>20</b>  | sextet           | 71.7                          | $0.48_{\pm 0.01}$                                      | $-0.22_{\pm 0.01}$                                     | $0.40_{\pm 0.01}$                                      | $50.38_{\pm 0.02}$                         | Goethite     |
|            | sextet           | 28.3                          | $0.42_{\pm 0.02}$                                      | $-0.13_{\pm 0.01}$                                     | $1.38_{\pm 0.09}$                                      | $44.25_{\pm 0.26}$                         | Goethite     |
| <b>50</b>  | sextet           | 45.9                          | $0.48_{\pm 0.01}$                                      | $-0.22_{\pm 0.01}$                                     | $0.33_{\pm 0.01}$                                      | $50.27_{\pm 0.03}$                         | Goethite     |
|            | sextet           | 18.7                          | $0.50_{\pm 0.01}$                                      | $-0.23_{\pm 0.02}$                                     | $0.44_{\pm 0.03}$                                      | $48.53_{\pm 0.11}$                         | Goethite     |
|            | doublet          | 35.5                          | $0.41_{\pm 0.04}$                                      | $0.00_{\pm 0.02}$                                      | $4.66_{\pm 0.58}$                                      | -                                          | Unknown      |
| <b>100</b> | sextet           | 42.4                          | $0.46_{\pm 0.01}$                                      | $-0.21_{\pm 0.01}$                                     | $0.32_{\pm 0.01}$                                      | $49.21_{\pm 0.02}$                         | Goethite     |
|            | sextet           | 30.2                          | $0.47_{\pm 0.01}$                                      | $-0.26_{\pm 0.02}$                                     | $0.58_{\pm 0.03}$                                      | $46.78_{\pm 0.10}$                         | Goethite     |
|            | doublet          | 27.3                          | $0.37_{\pm 0.01}$                                      | $0.63_{\pm 0.03}$                                      | $1.11_{\pm 0.04}$                                      | -                                          | Unknown      |
| <b>150</b> | sextet           | 37.1                          | $0.45_{\pm 0.01}$                                      | $-0.22_{\pm 0.01}$                                     | $0.36_{\pm 0.02}$                                      | $47.22_{\pm 0.03}$                         | Goethite     |
|            | sextet           | 36.8                          | $0.46_{\pm 0.01}$                                      | $-0.18_{\pm 0.02}$                                     | $0.83_{\pm 0.03}$                                      | $43.98_{\pm 0.12}$                         | Goethite     |
|            | doublet          | 26.1                          | $0.36_{\pm 0.01}$                                      | $0.67_{\pm 0.02}$                                      | $0.80_{\pm 0.03}$                                      | -                                          | Amorphous    |
| <b>200</b> | sextet           | 38.1                          | $0.42_{\pm 0.02}$                                      | $-0.24_{\pm 0.03}$                                     | $1.07_{\pm 0.05}$                                      | $40.01_{\pm 0.17}$                         | Goethite     |
|            | sextet           | 35.1                          | $0.42_{\pm 0.01}$                                      | $-0.23_{\pm 0.01}$                                     | $0.45_{\pm 0.02}$                                      | $44.11_{\pm 0.04}$                         | Goethite     |
|            | doublet          | 26.8                          | $0.32_{\pm 0.01}$                                      | $0.65_{\pm 0.02}$                                      | $0.81_{\pm 0.03}$                                      | -                                          | Amorphous    |

|            |         |      |                              |                               |                               |                                |                   |
|------------|---------|------|------------------------------|-------------------------------|-------------------------------|--------------------------------|-------------------|
| <b>250</b> | sextet  | 42.7 | <b>0.41</b> <sub>±0.01</sub> | <b>-0.24</b> <sub>±0.02</sub> | <b>1.19</b> <sub>±0.05</sub>  | <b>34.95</b> <sub>±0.18</sub>  | Goethite          |
|            | sextet  | 28.6 | <b>0.40</b> <sub>±0.01</sub> | <b>-0.26</b> <sub>±0.01</sub> | <b>0.49</b> <sub>±0.02</sub>  | <b>39.94</b> <sub>±0.05</sub>  | Goethite          |
|            | doublet | 28.7 | <b>0.30</b> <sub>±0.01</sub> | <b>0.70</b> <sub>±0.02</sub>  | <b>0.781</b> <sub>±0.03</sub> | -                              | Amorphous         |
| <b>300</b> | sextet  | 47.8 | <b>0.37</b> <sub>±0.06</sub> | <b>-0.26</b> <sub>±0.11</sub> | <b>1.37</b> <sub>±0.10</sub>  | <b>31.55</b> <sub>±0.192</sub> | Goethite          |
|            | sextet  | 24.3 | <b>0.47</b> <sub>±0.06</sub> | <b>0.00</b> <sub>±0.02</sub>  | <b>1.15</b> <sub>±0.17</sub>  | <b>18.85</b> <sub>±0.32</sub>  | Unknown           |
|            | doublet | 23.6 | <b>0.31</b> <sub>±0.01</sub> | <b>0.63</b> <sub>±0.03</sub>  | <b>0.61</b> <sub>±0.05</sub>  | -                              | Amorphous         |
|            | doublet | 4.4  | <b>0.50</b> <sub>±0.02</sub> | <b>1.44</b> <sub>±0.04</sub>  | <b>0.31</b> <sub>±0.07</sub>  | -                              | Superparamagnetic |

$\delta$ : isomer shift,  $A$ : quadrupole splitting,  $\varDelta$ : FWHM,  $H_{\text{int}}$ : Internal magnetic field

**Table S4.**  $^{57}\text{Fe}$ - Mössbauer spectra measured at low temperature from 20K to 300K of Ni20

| <b>T/K</b> | <b>Component</b> | <b><math>A</math><br/>(%)</b> | <b><math>\delta</math><br/>(mms<sup>-1</sup>)</b> | <b><math>\varDelta</math><br/>(mms<sup>-1</sup>)</b> | <b><math>\Gamma</math><br/>(mms<sup>-1</sup>)</b> | <b><math>H_{\text{int}}</math><br/>(T)</b> | <b>Phase</b> |
|------------|------------------|-------------------------------|---------------------------------------------------|------------------------------------------------------|---------------------------------------------------|--------------------------------------------|--------------|
| <b>20</b>  | sextet           | 100                           | <b>0.48</b> <sub>±0.01</sub>                      | <b>-0.22</b> <sub>±0.01</sub>                        | <b>0.43</b> <sub>±0.01</sub>                      | <b>50.37</b> <sub>±0.02</sub>              | Goethite     |
|            | doublet          | 45.1                          | <b>0.36</b> <sub>±0.01</sub>                      | <b>-0.00</b> <sub>±0.01</sub>                        | <b>2.11</b> <sub>±0.12</sub>                      | -                                          | Unknown      |
| <b>100</b> | sextet           | 57.4                          | <b>0.47</b> <sub>±0.01</sub>                      | <b>-0.22</b> <sub>±0.01</sub>                        | <b>0.45</b> <sub>±0.01</sub>                      | <b>50.14</b> <sub>±0.02</sub>              | Goethite     |
|            | doublet          | 42.6                          | <b>0.39</b> <sub>±0.01</sub>                      | <b>0.62</b> <sub>±0.01</sub>                         | <b>0.67</b> <sub>±0.02</sub>                      | -                                          | Amorphous    |
| <b>150</b> | sextet           | 55.9                          | <b>0.44</b> <sub>±0.01</sub>                      | <b>-0.25</b> <sub>±0.01</sub>                        | <b>0.53</b> <sub>±0.01</sub>                      | <b>47.20</b> <sub>±0.03</sub>              | Goethite     |
|            | doublet          | 44.1                          | <b>0.37</b> <sub>±0.01</sub>                      | <b>0.61</b> <sub>±0.01</sub>                         | <b>0.66</b> <sub>±0.02</sub>                      | -                                          | Amorphous    |
| <b>200</b> | sextet           | 29.2                          | <b>0.44</b> <sub>±0.01</sub>                      | <b>-0.20</b> <sub>±0.03</sub>                        | <b>0.91</b> <sub>±0.06</sub>                      | <b>41.26</b> <sub>±0.23</sub>              | Goethite     |
|            | sextet           | 28.9                          | <b>0.43</b> <sub>±0.01</sub>                      | <b>-0.23</b> <sub>±0.01</sub>                        | <b>0.40</b> <sub>±0.02</sub>                      | <b>44.83</b> <sub>±0.05</sub>              | Goethite     |
|            | doublet          | 41.8                          | <b>0.35</b> <sub>±0.01</sub>                      | <b>0.59</b> <sub>±0.01</sub>                         | <b>0.64</b> <sub>±0.02</sub>                      | -                                          | Amorphous    |
| <b>250</b> | sextet           | 31.1                          | <b>0.41</b> <sub>±0.02</sub>                      | <b>-0.28</b> <sub>±0.04</sub>                        | <b>1.03</b> <sub>±0.07</sub>                      | <b>36.47</b> <sub>±0.26</sub>              | Goethite     |
|            | sextet           | 27.7                          | <b>0.39</b> <sub>±0.01</sub>                      | <b>-0.24</b> <sub>±0.01</sub>                        | <b>0.48</b> <sub>±0.03</sub>                      | <b>40.82</b> <sub>±0.07</sub>              | Goethite     |
|            | doublet          | 41.2                          | <b>0.31</b> <sub>±0.01</sub>                      | <b>0.60</b> <sub>±0.01</sub>                         | <b>0.60</b> <sub>±0.02</sub>                      | -                                          | Amorphous    |

|            |                |             |                             |                              |                             |                              |                  |
|------------|----------------|-------------|-----------------------------|------------------------------|-----------------------------|------------------------------|------------------|
| <b>300</b> | <b>sextet</b>  | <b>32.6</b> | <b>0.35<sub>±0.01</sub></b> | <b>-0.31<sub>±0.03</sub></b> | <b>0.85<sub>±0.05</sub></b> | <b>34.09<sub>±0.12</sub></b> | <b>Goethite</b>  |
|            | <b>sextet</b>  | <b>27.0</b> | <b>0.03<sub>0.05</sub></b>  | <b>-0.49<sub>±0.09</sub></b> | <b>1.43<sub>±0.16</sub></b> | <b>24.10<sub>±0.41</sub></b> | <b>Goethite</b>  |
|            | <b>doublet</b> | <b>38.0</b> | <b>0.29<sub>±0.01</sub></b> | <b>0.60<sub>±0.01</sub></b>  | <b>0.56<sub>±0.02</sub></b> | -                            | <b>Amorphous</b> |
|            | <b>doublet</b> | <b>2.5</b>  | <b>0.55<sub>±0.02</sub></b> | <b>1.53<sub>±0.02</sub></b>  | <b>0.19<sub>±0.05</sub></b> | -                            | <b>Unknown</b>   |

$\delta$ : isomer shift,  $\Delta$ : quadrupole splitting,  $F$ : FWHM,  $H_{\text{int}}$ :  $H_{\text{int}}$ : Internal magnetic field
